# Supplementary material
Source: publisher figshare collection journal article supplement (https://gsapubs.figshare.com/ndownloader/files/22408923)
Supplement: Supplementary file 1 [file 22408923]

## SUPPLEMENTAL INFORMATION

### Legend

| <u>Depositional Environments:</u>                                                                                              | <u>Sedimentary Patterns:</u>                                                                                   |
|--------------------------------------------------------------------------------------------------------------------------------|----------------------------------------------------------------------------------------------------------------|
|  Alamo Breccia                                |  Limestone                   |
|  Peritidal                                    |  Silty limestone             |
|  Shoreface                                    |  Dolomite                    |
|  Channel                                      |  Silty dolomite              |
|  Semi-restricted/restricted, shallow subtidal |  Dolomitic sandstone         |
|  Bioherm                                    |  Sandstone (quartzarenite) |
|  Open, shallow to intermediate subtidal     |  Siltstone                 |
|  Deep subtidal                              |  Breccia                   |

**Figure A1.** Legend of depositional environments and sedimentary patterns used to describe detailed measured sections.

Retzler, A.J., Tapanila, L., Steenberg, J.R., Johnson, C.J., and Myers, R.A., 2015, Post-impact depositional environments as a proxy for crater morphology, Late Devonian Alamo impact, Nevada: *Geosphere*, v. 11, p. 123–143, doi:10.1130/GES00964.1

**Section: GGS3**

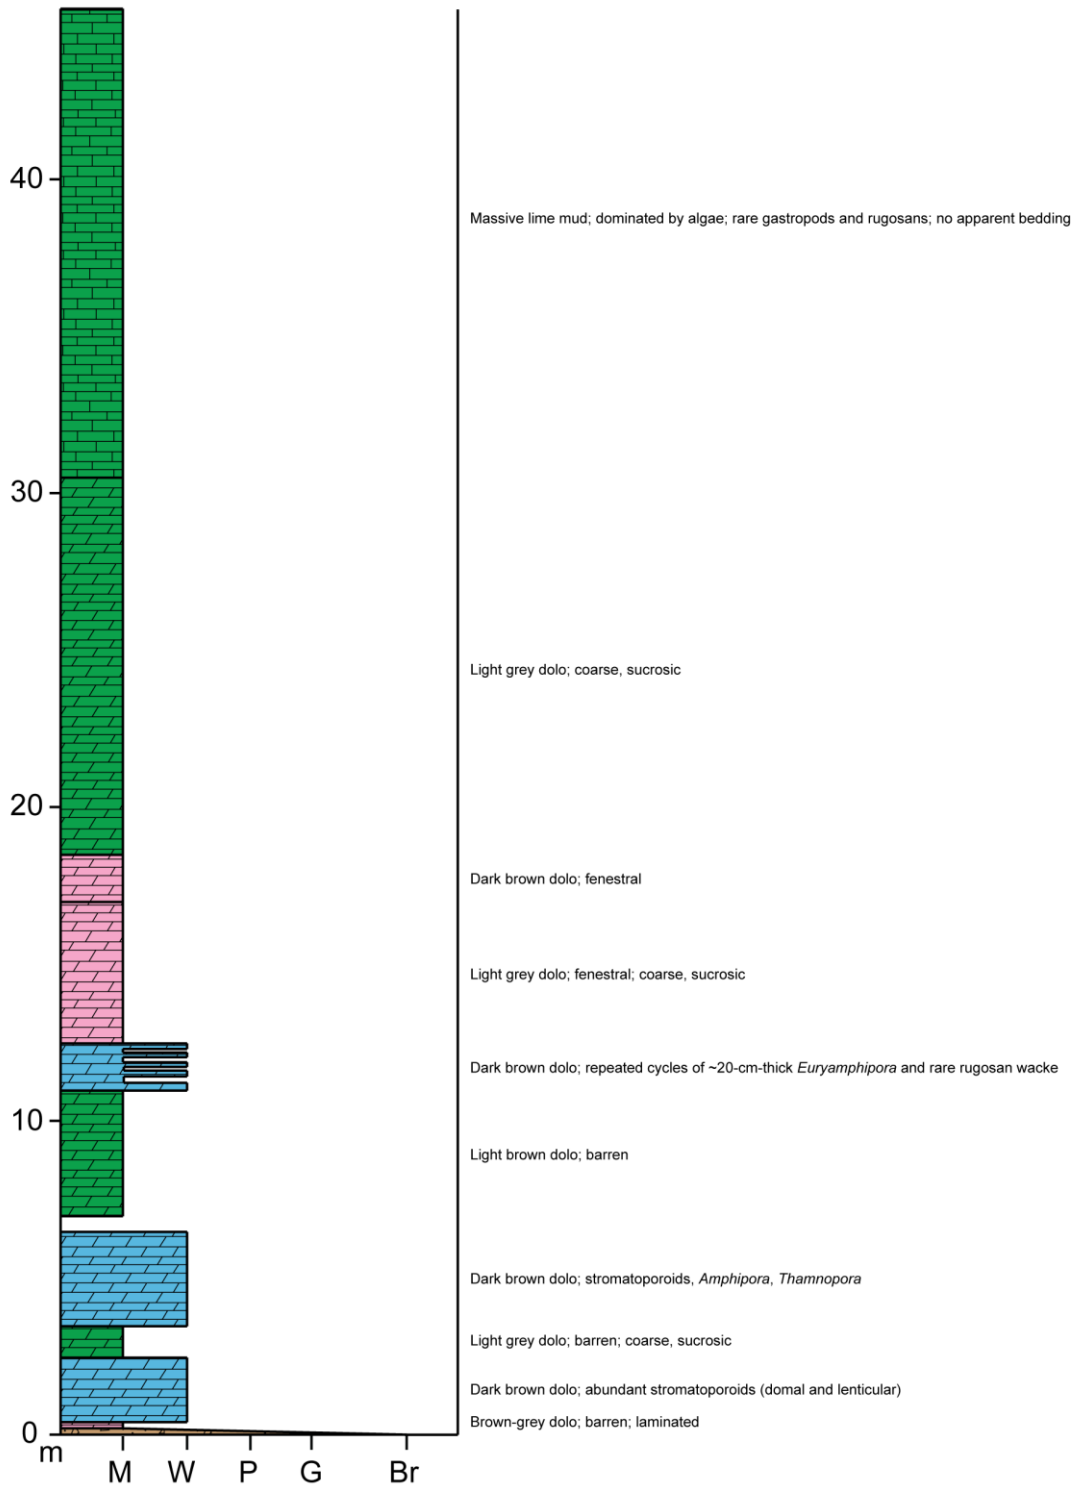

**Figure A2.** GGS3 detailed measured section.

**Figure A3.** GGS3 (cont.) detailed measured section.

Retzler, A.J., Tapanila, L., Steenberg, J.R., Johnson, C.J., and Myers, R.A., 2015, Post-impact depositional environments as a proxy for crater morphology, Late Devonian Alamo impact, Nevada: *Geosphere*, v. 11, p. 123–143, doi:10.1130/GES00964.1

**Section: MMN4**

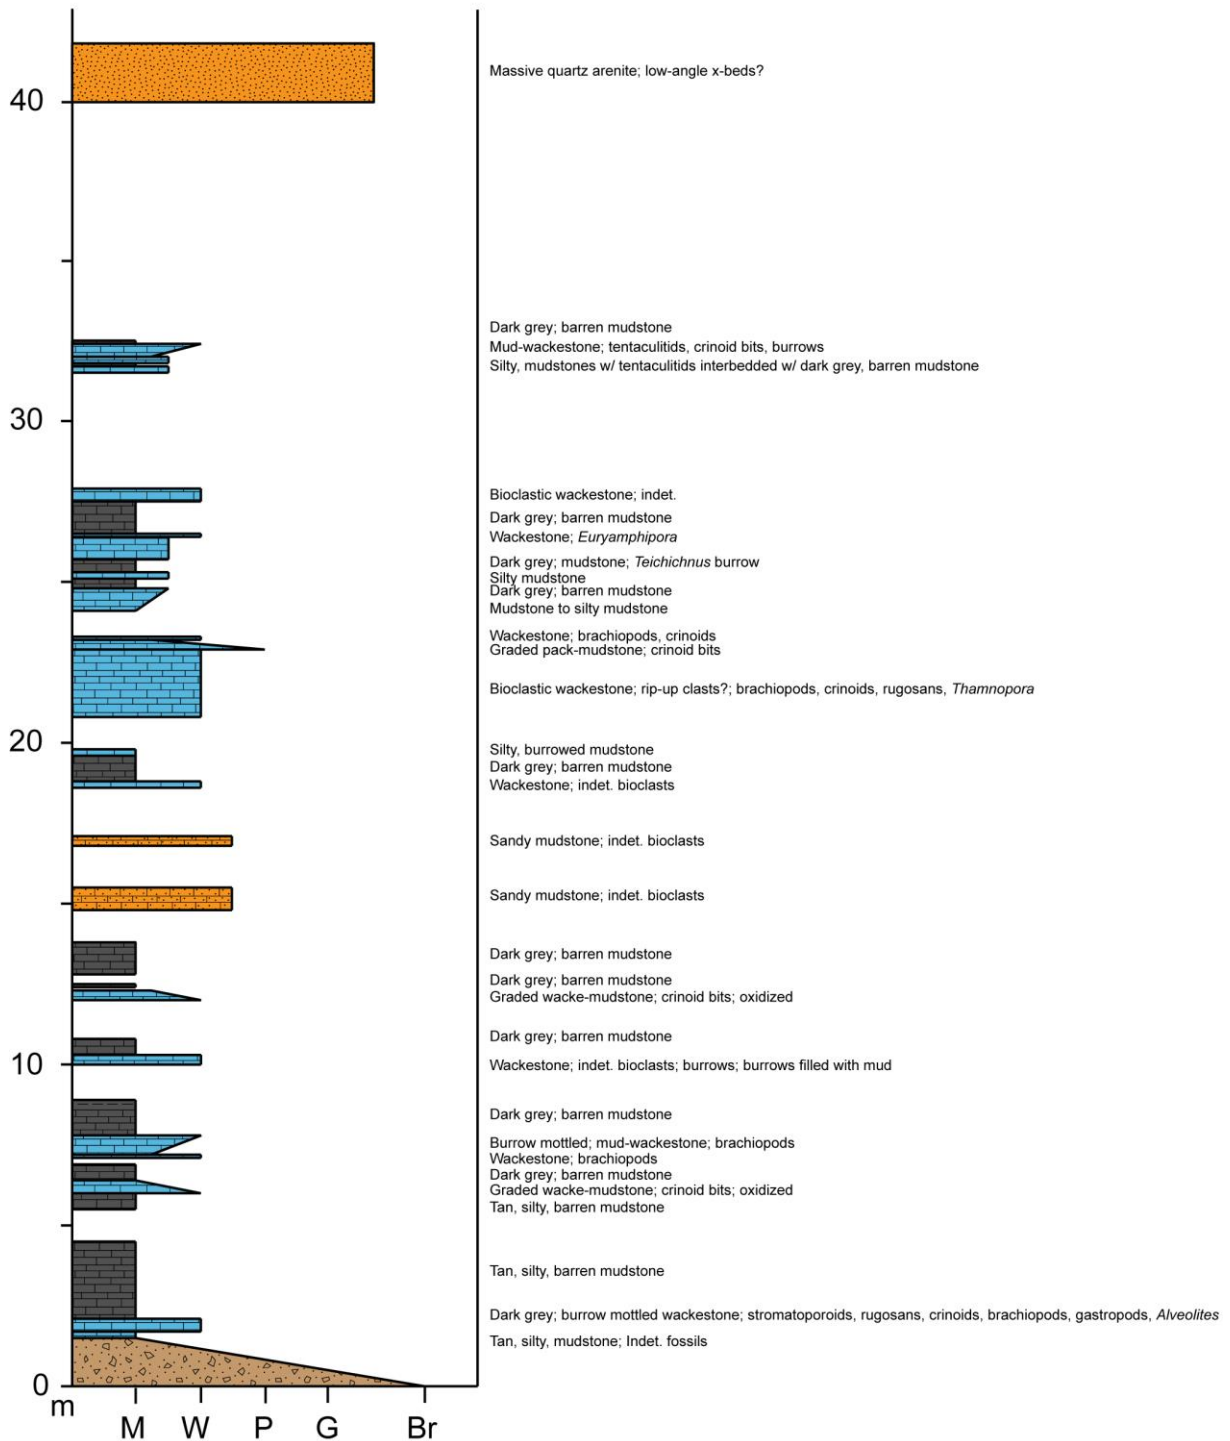

**Figure A4.** MMN4 detailed measured section.

Retzler, A.J., Tapanila, L., Steenberg, J.R., Johnson, C.J., and Myers, R.A., 2015, Post-impact depositional environments as a proxy for crater morphology, Late Devonian Alamo impact, Nevada: *Geosphere*, v. 11, p. 123–143, doi:10.1130/GES00964.1

Retzler, A.J., Tapanila, L., Steenberg, J.R., Johnson, C.J., and Myers, R.A., 2015, Post-impact depositional environments as a proxy for crater morphology, Late Devonian Alamo impact, Nevada: *Geosphere*, v. 11, p. 123–143, doi:10.1130/GES00964.1

**Section: MMS2**

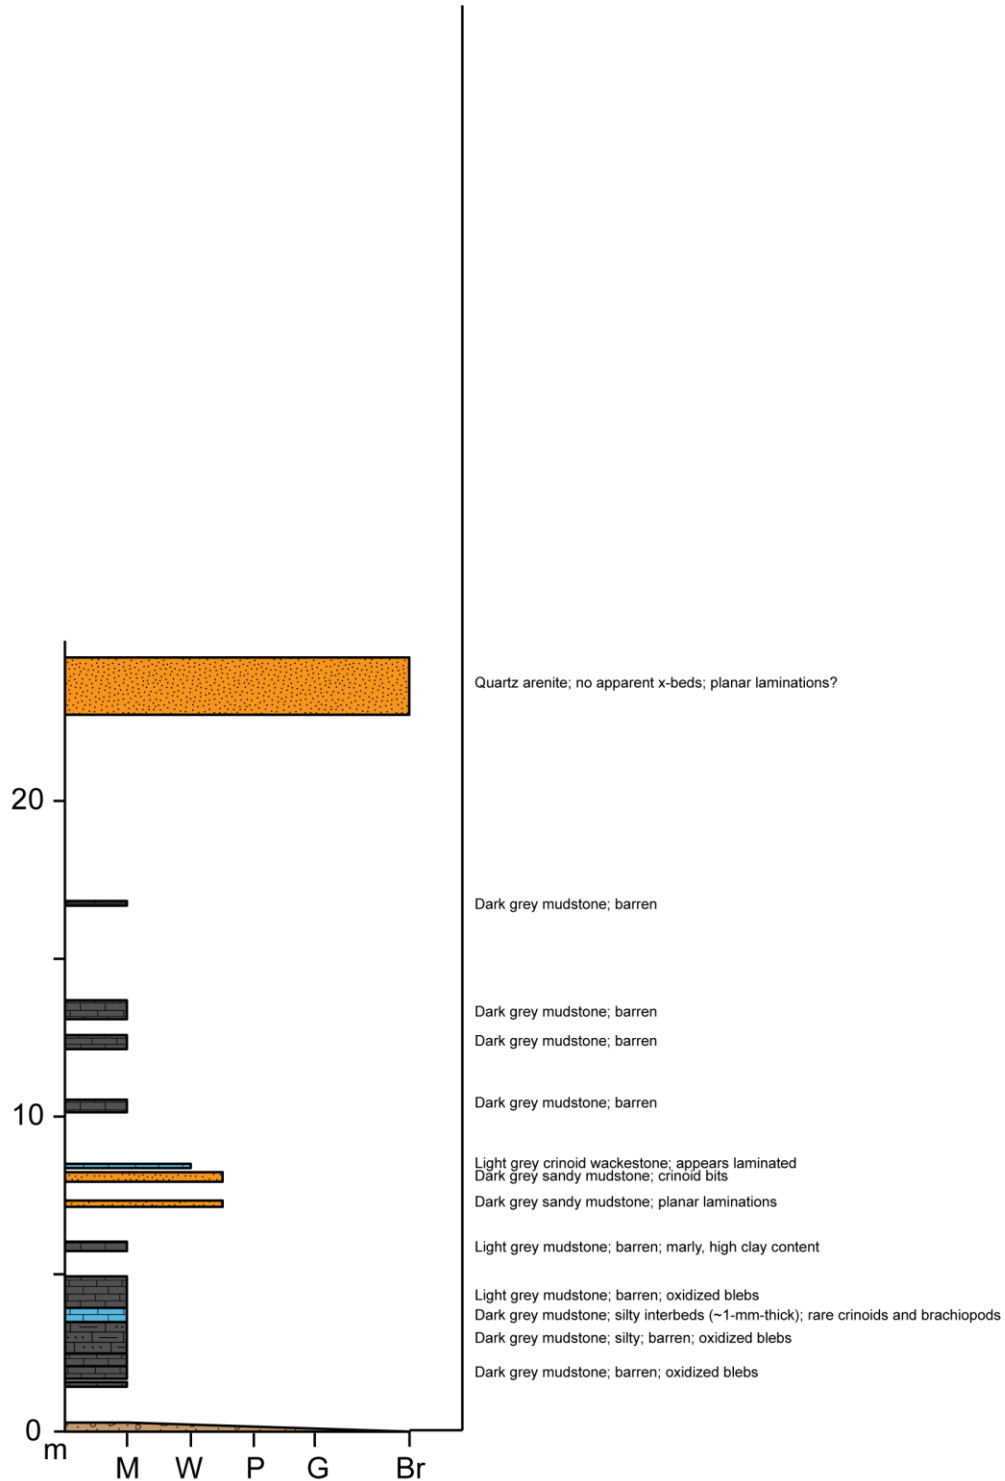

**Figure A5.** MMS2 detailed measured section.

Retzler, A.J., Tapanila, L., Steenberg, J.R., Johnson, C.J., and Myers, R.A., 2015, Post-impact depositional environments as a proxy for crater morphology, Late Devonian Alamo impact, Nevada: *Geosphere*, v. 11, p. 123–143, doi:10.1130/GES00964.1

**Section: PTN0**

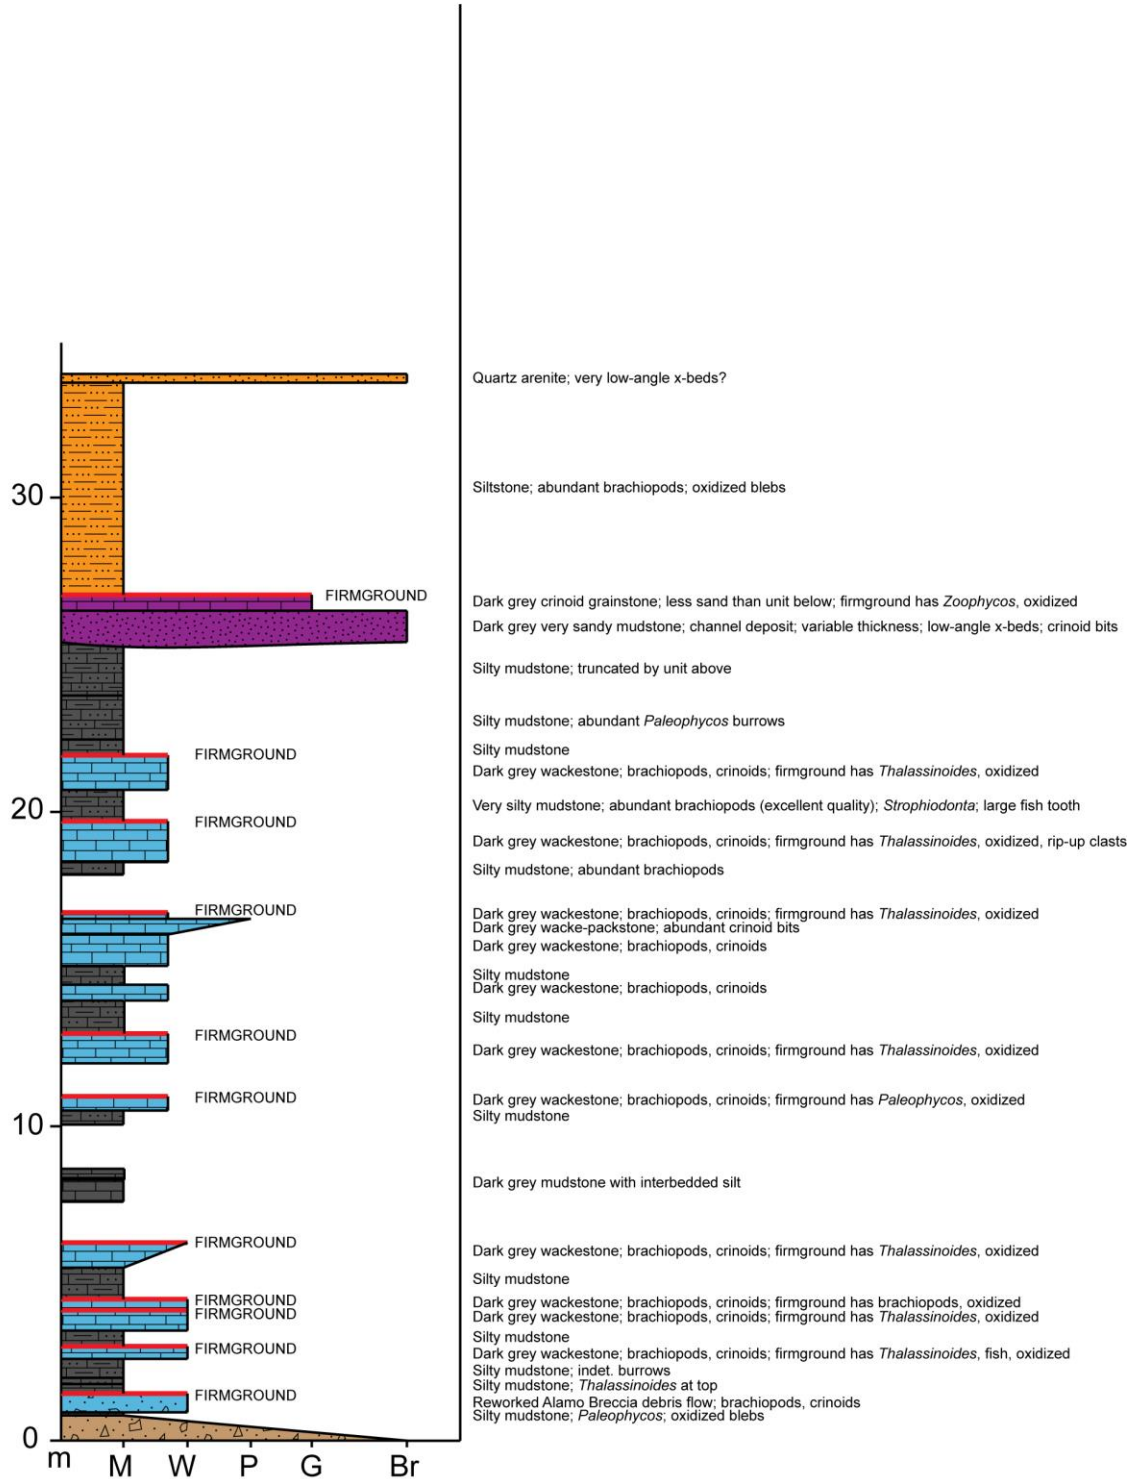

**Figure A6.** PTN0 detailed measured section.

Retzler, A.J., Tapanila, L., Steenberg, J.R., Johnson, C.J., and Myers, R.A., 2015, Post-impact depositional environments as a proxy for crater morphology, Late Devonian Alamo impact, Nevada: *Geosphere*, v. 11, p. 123–143, doi:10.1130/GES00964.1

**Section: HN5**

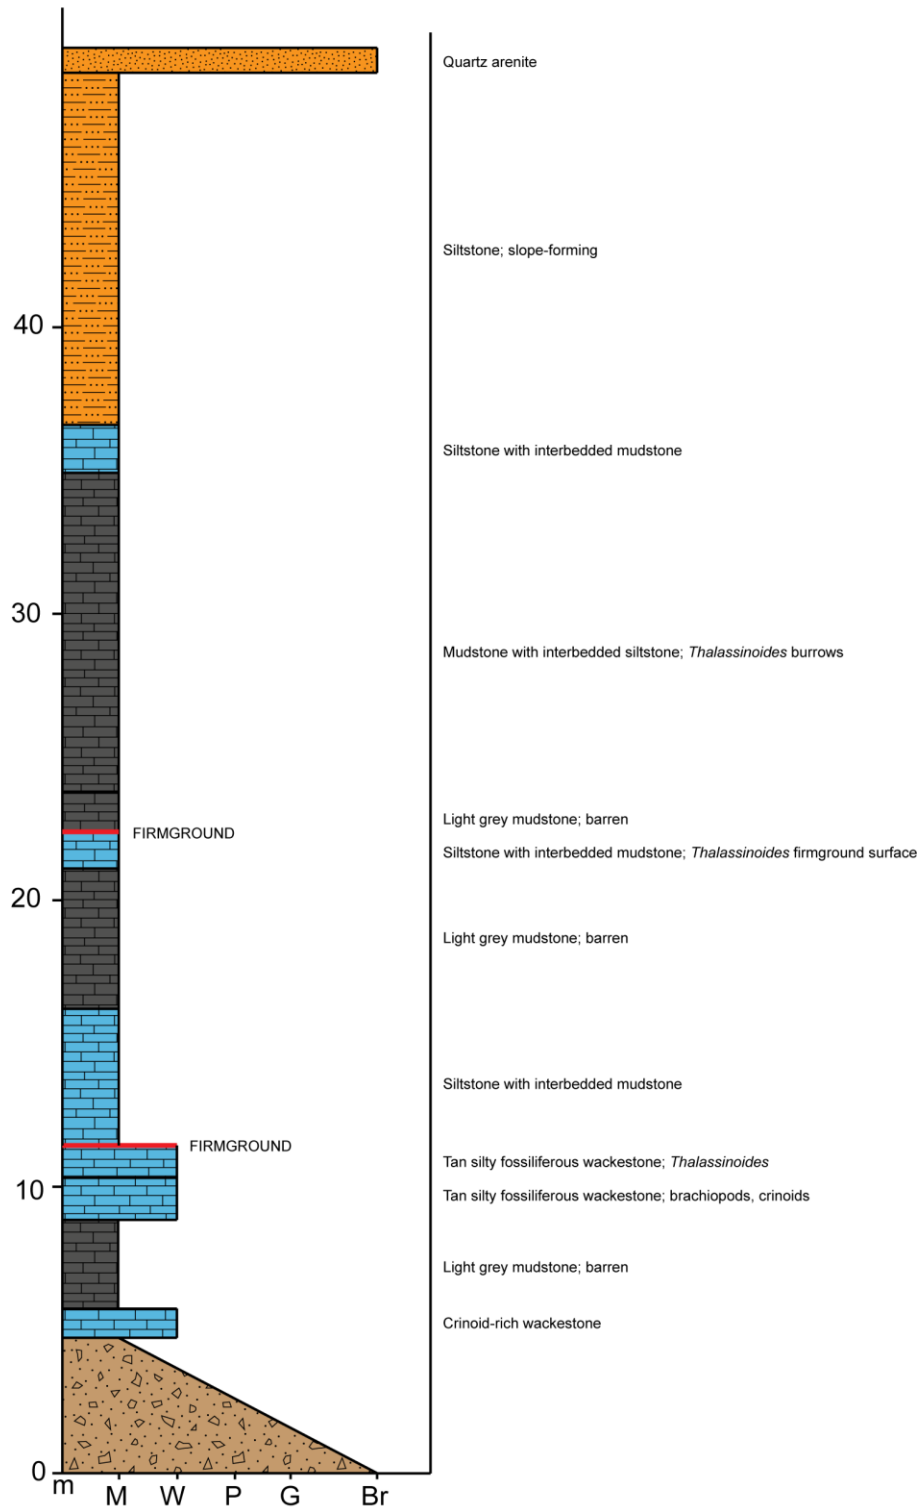

**Figure A7.** HN5 detailed measured section.



Retzler, A.J., Tapanila, L., Steenberg, J.R., Johnson, C.J., and Myers, R.A., 2015, Post-impact depositional environments as a proxy for crater morphology, Late Devonian Alamo impact, Nevada: *Geosphere*, v. 11, p. 123–143, doi:10.1130/GES00964.1

**Section: DDB1**

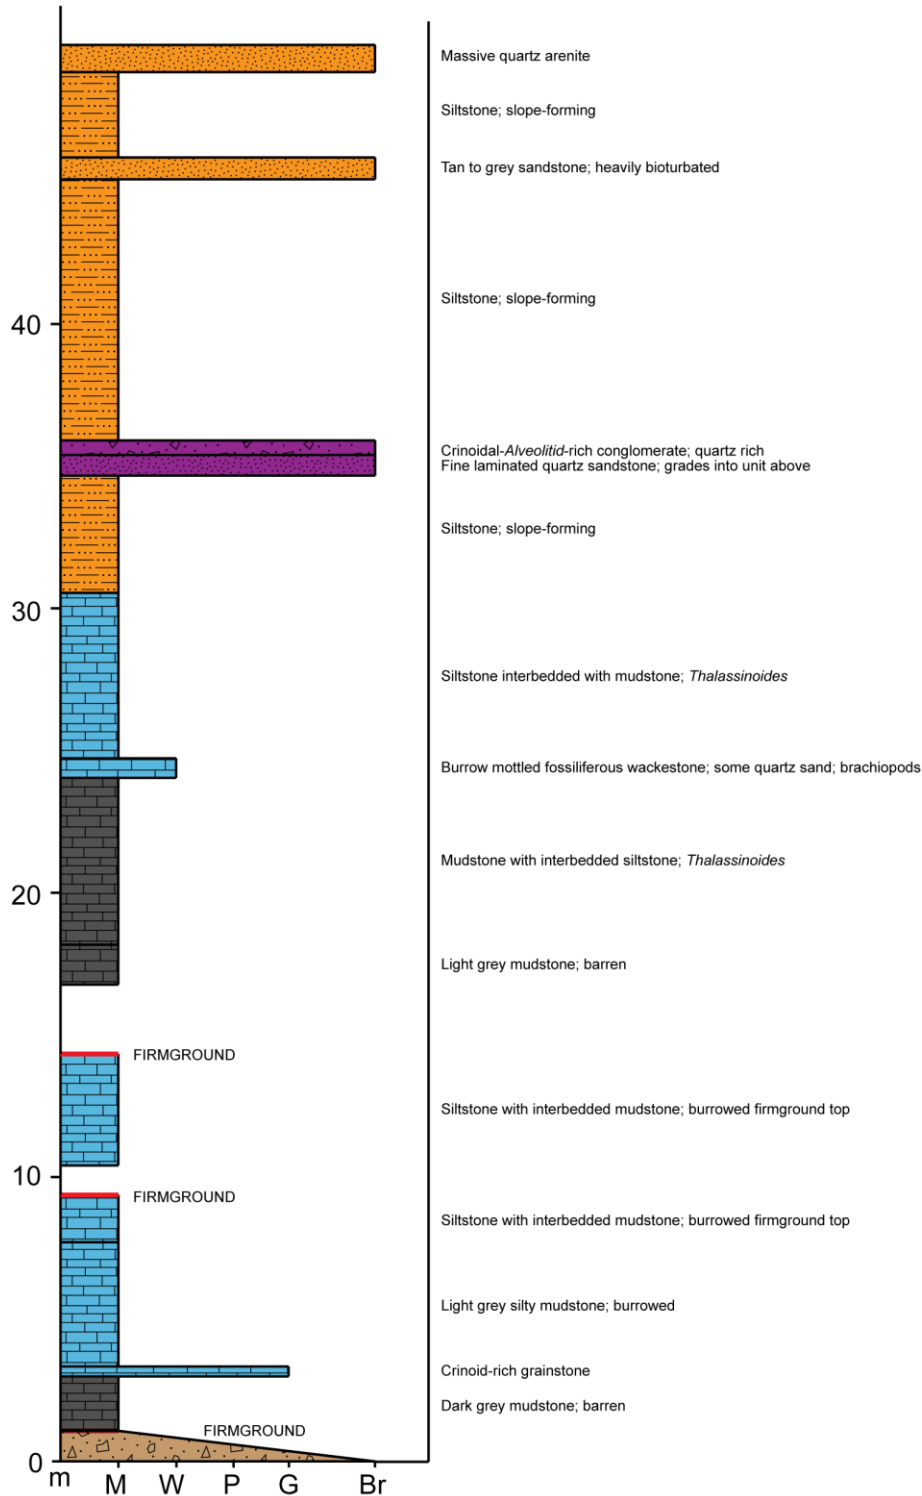

**Figure A8.** DDB1 detailed measured section.

Retzler, A.J., Tapanila, L., Steenberg, J.R., Johnson, C.J., and Myers, R.A., 2015, Post-impact depositional environments as a proxy for crater morphology, Late Devonian Alamo impact, Nevada: *Geosphere*, v. 11, p. 123–143, doi:10.1130/GES00964.1

Section: HE6

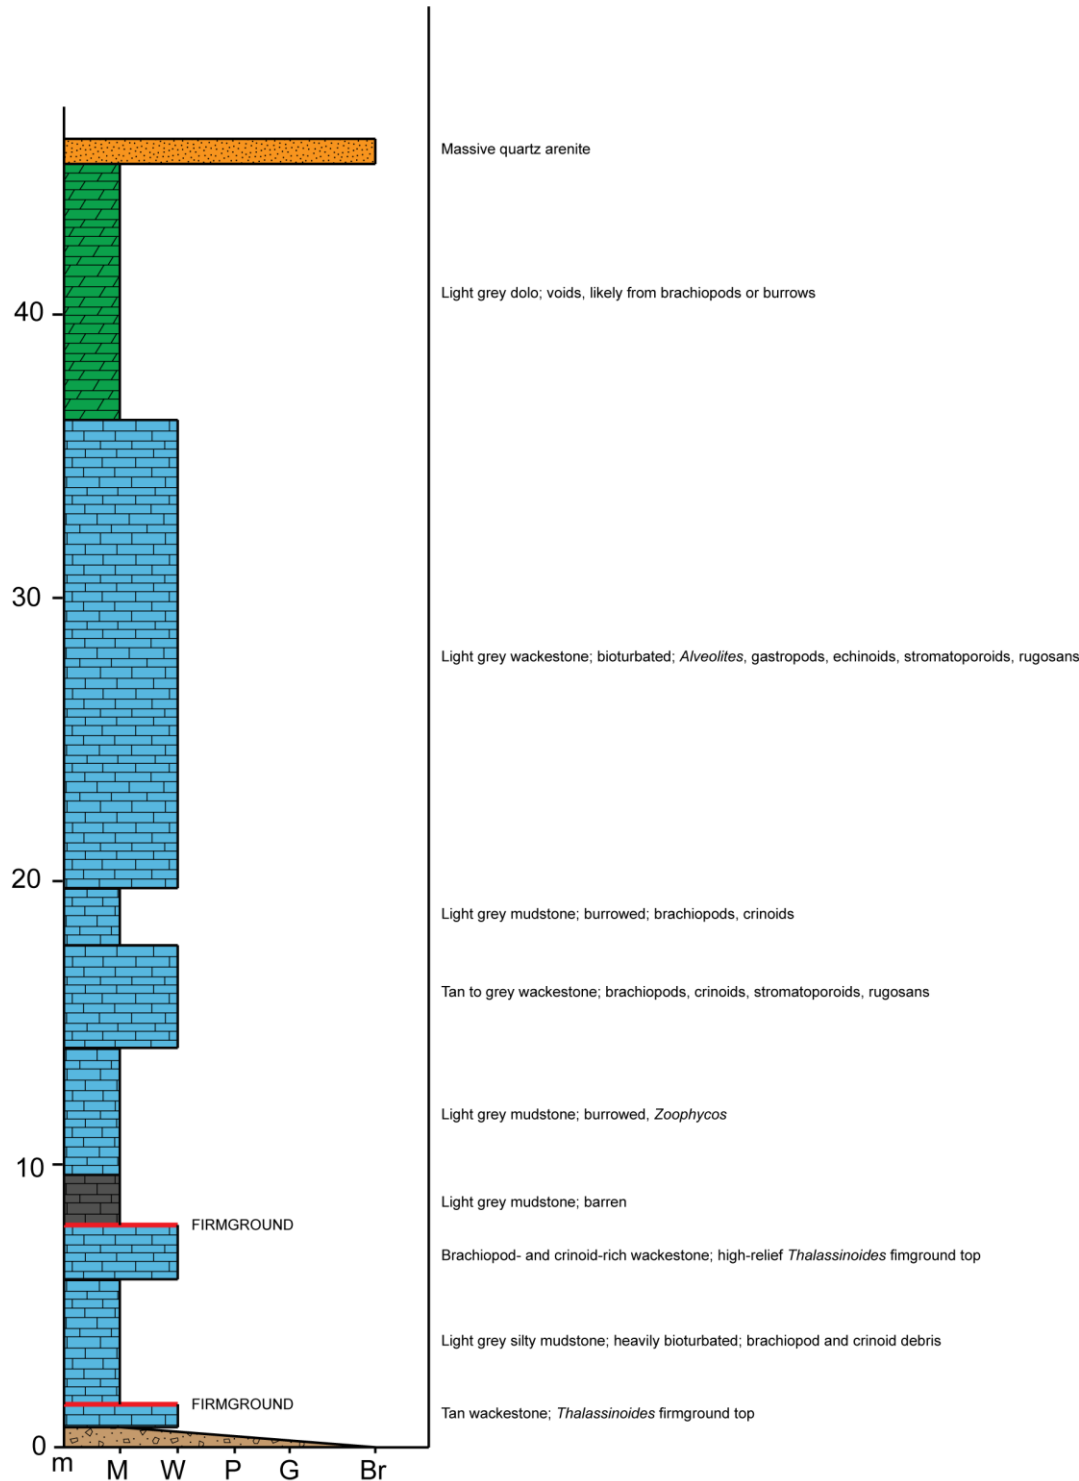

Figure A9. HE6 detailed measured section.

Retzler, A.J., Tapanila, L., Steenberg, J.R., Johnson, C.J., and Myers, R.A., 2015, Post-impact depositional environments as a proxy for crater morphology, Late Devonian Alamo impact, Nevada: *Geosphere*, v. 11, p. 123–143, doi:10.1130/GES00964.1

**Section: SMFN2**

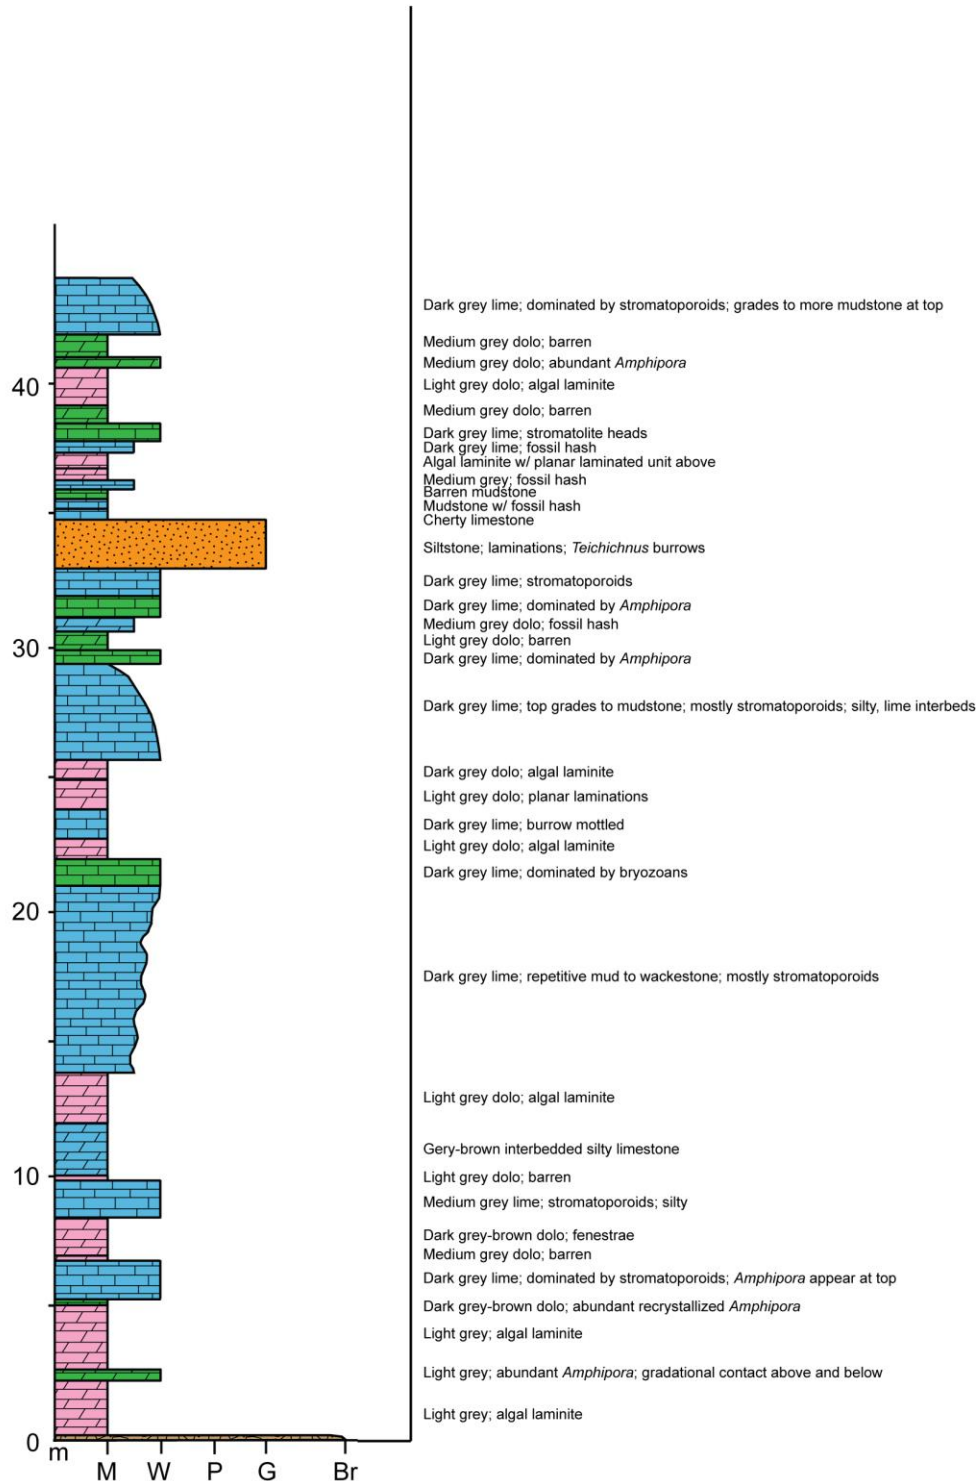

**Figure A10.** SMFN2 detailed measured section.

Retzler, A.J., Tapanila, L., Steenberg, J.R., Johnson, C.J., and Myers, R.A., 2015, Post-impact depositional environments as a proxy for crater morphology, Late Devonian Alamo impact, Nevada: *Geosphere*, v. 11, p. 123–143, doi:10.1130/GES00964.1

**Section: HCE1**

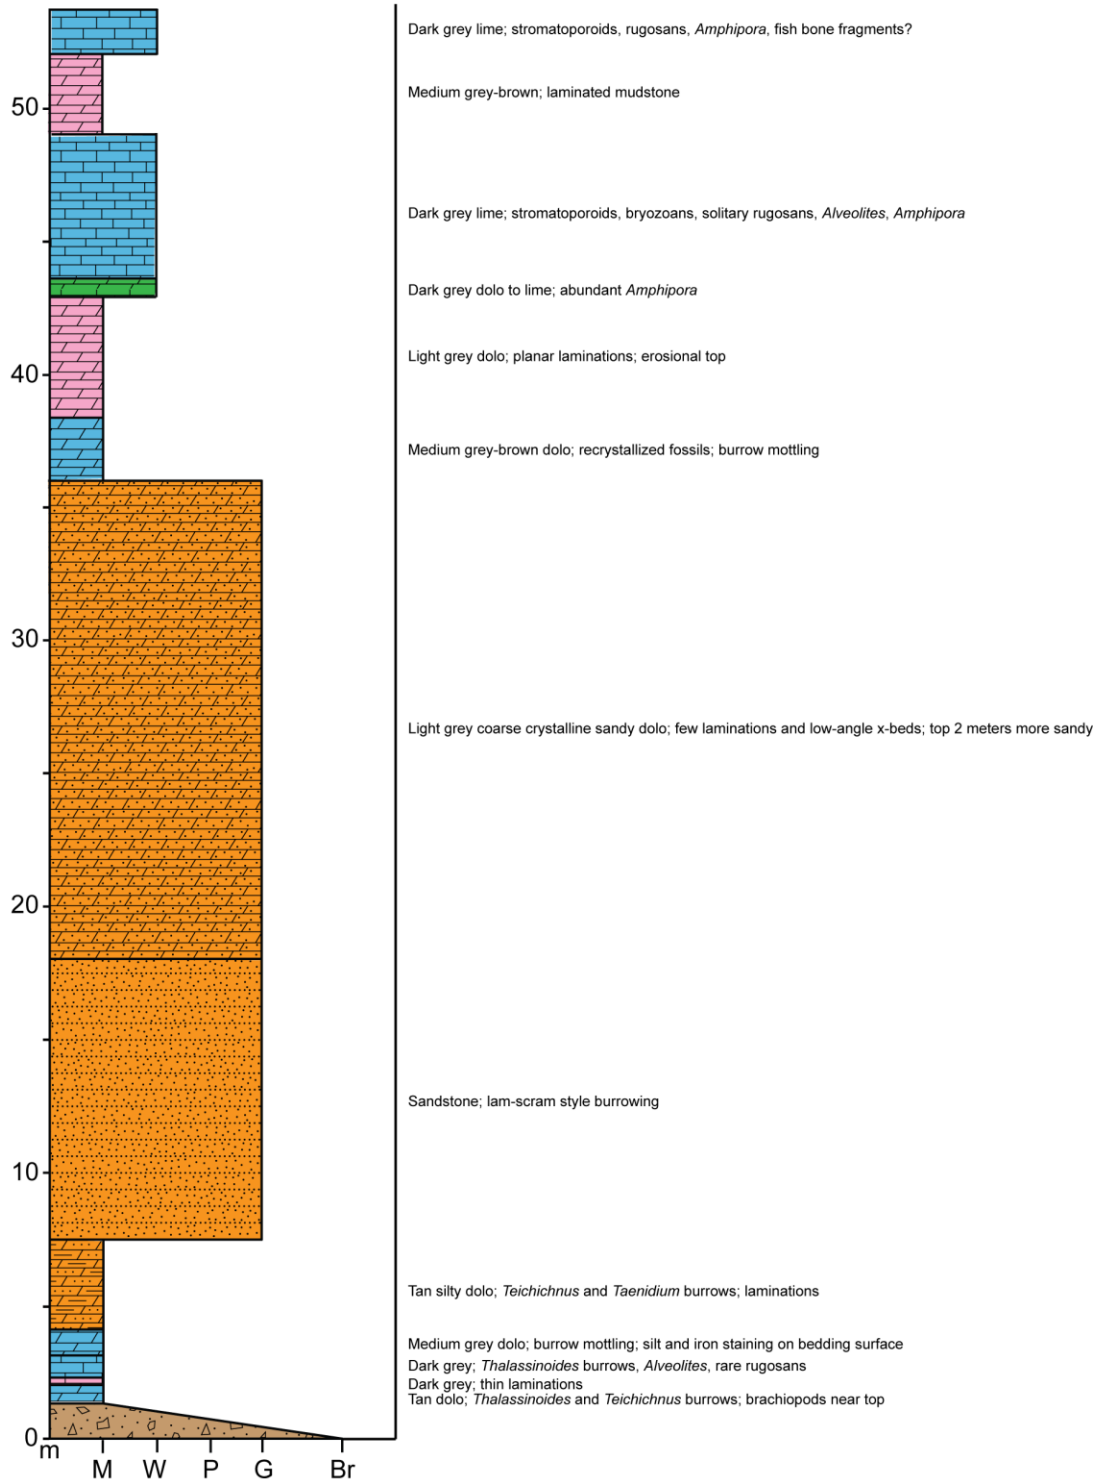

**Figure A11.** HCE1 detailed measured section.

Retzler, A.J., Tapanila, L., Steenberg, J.R., Johnson, C.J., and Myers, R.A., 2015, Post-impact depositional environments as a proxy for crater morphology, Late Devonian Alamo impact, Nevada: *Geosphere*, v. 11, p. 123–143, doi:10.1130/GES00964.1

**Section:** HCE1 cont.

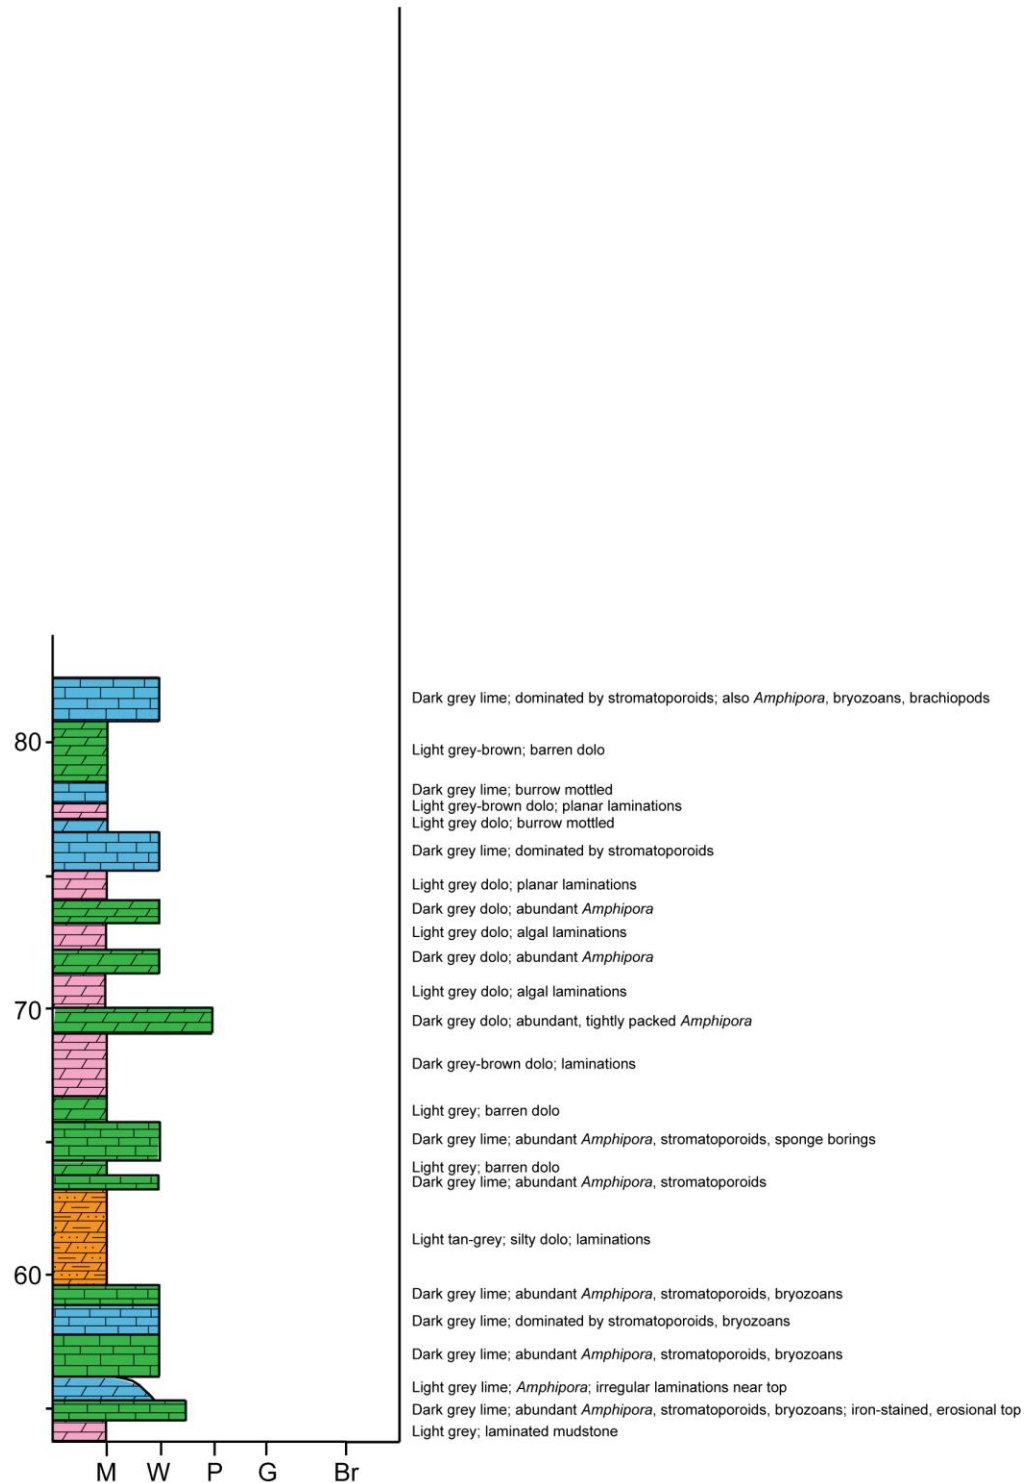

Retzler, A.J., Tapanila, L., Steenberg, J.R., Johnson, C.J., and Myers, R.A., 2015, Post-impact depositional environments as a proxy for crater morphology, Late Devonian Alamo impact, Nevada: *Geosphere*, v. 11, p. 123–143, doi:10.1130/GES00964.1

**Figure A12.** HCE1 (cont.) detailed measured section.  
Section: HHN1

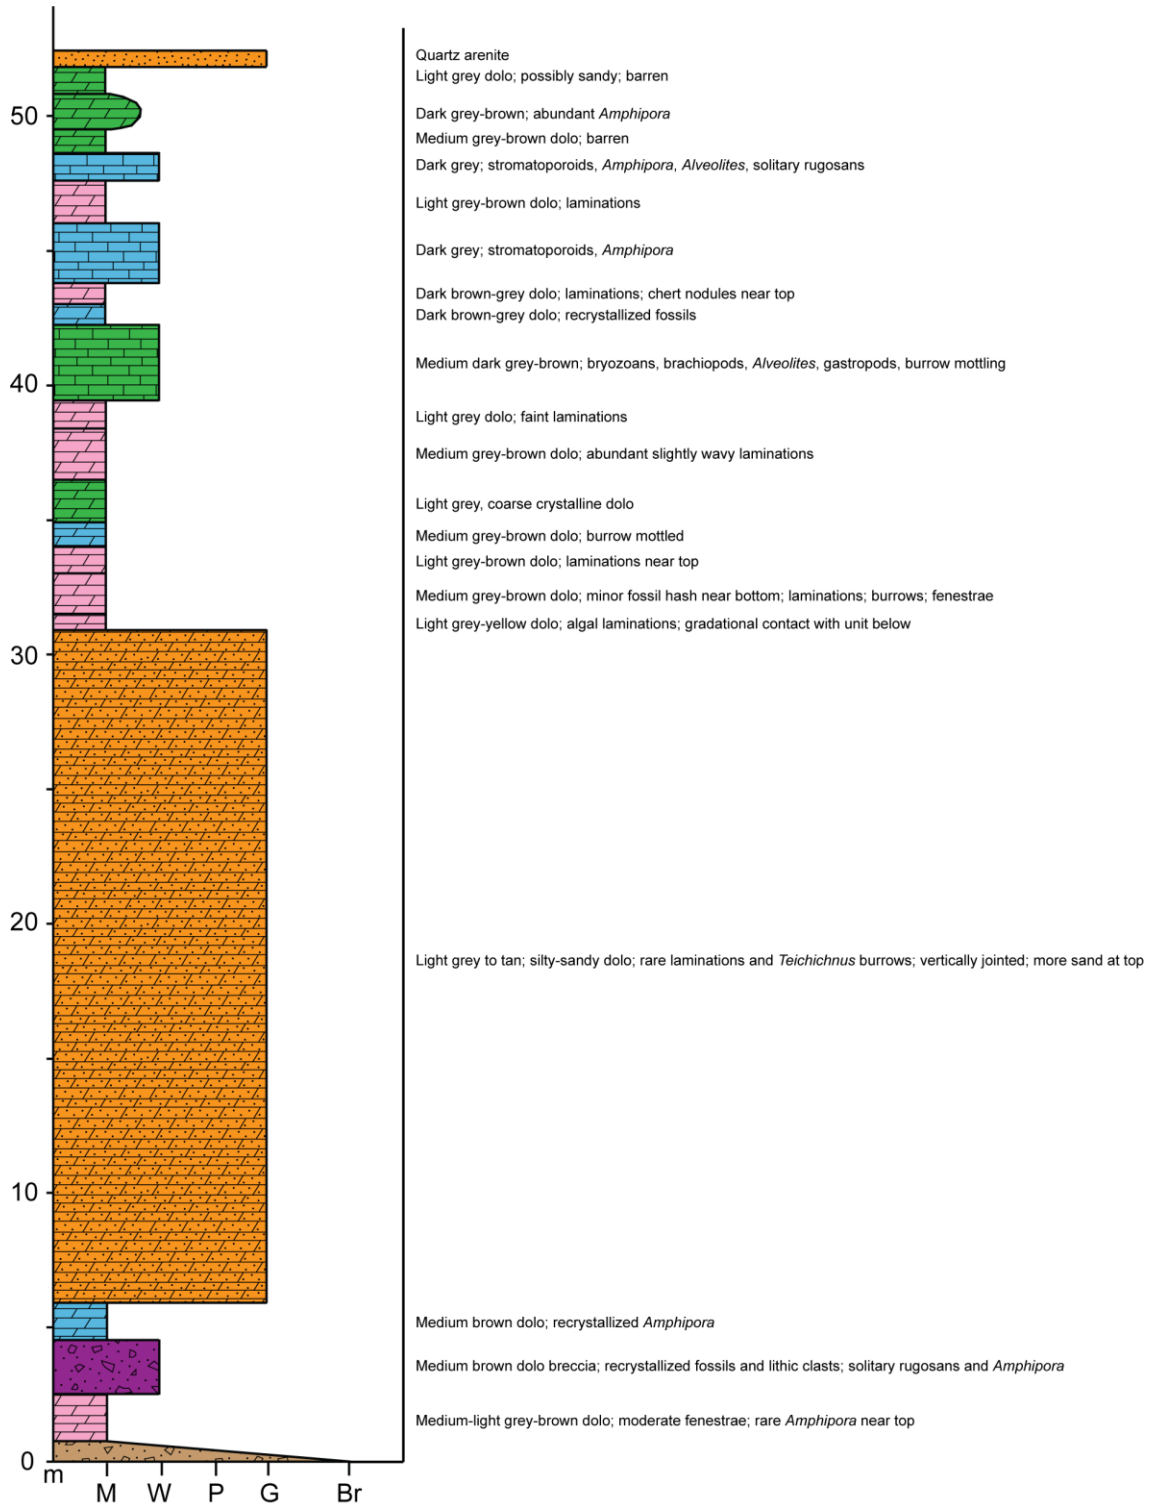

Retzler, A.J., Tapanila, L., Steenberg, J.R., Johnson, C.J., and Myers, R.A., 2015, Post-impact depositional environments as a proxy for crater morphology, Late Devonian Alamo impact, Nevada: *Geosphere*, v. 11, p. 123–143, doi:10.1130/GES00964.1

**Figure A13.** HHN1 detailed measured section.

Retzler, A.J., Tapanila, L., Steenberg, J.R., Johnson, C.J., and Myers, R.A., 2015, Post-impact depositional environments as a proxy for crater morphology, Late Devonian Alamo impact, Nevada: *Geosphere*, v. 11, p. 123–143, doi:10.1130/GES00964.1

**Section: DMP1**

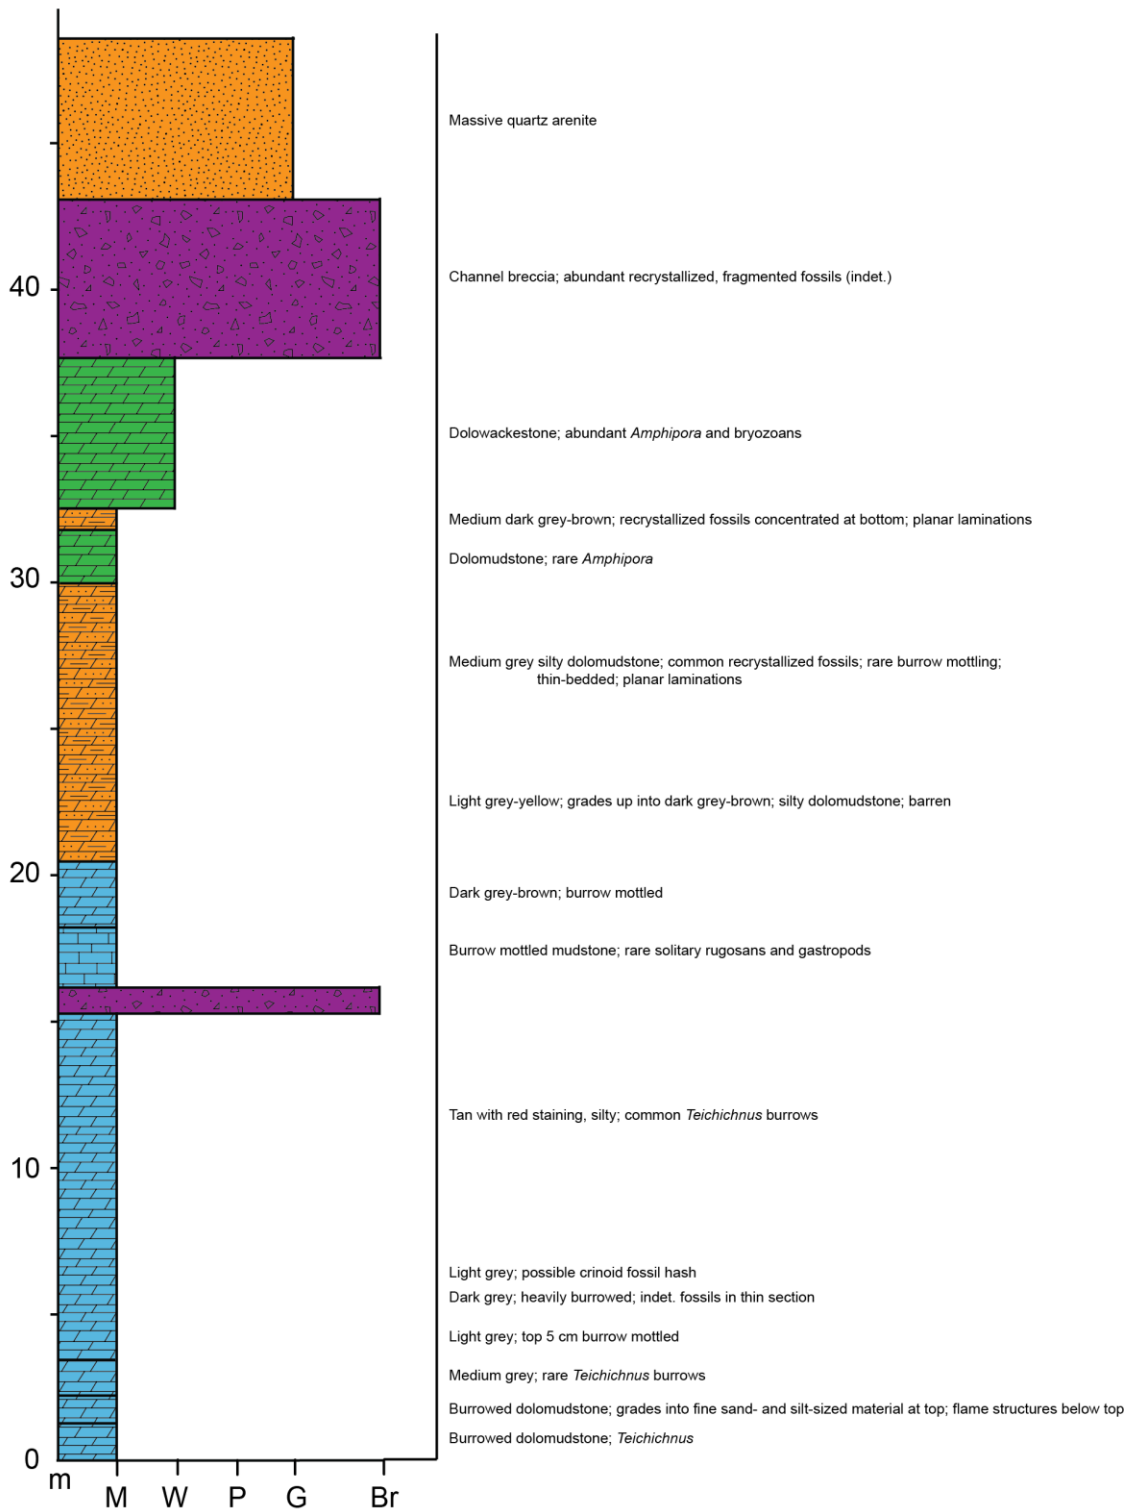

**Figure A14.** DMP1 detailed measured section.



Retzler, A.J., Tapanila, L., Steenberg, J.R., Johnson, C.J., and Myers, R.A., 2015, Post-impact depositional environments as a proxy for crater morphology, Late Devonian Alamo impact, Nevada: *Geosphere*, v. 11, p. 123–143, doi:10.1130/GES00964.1

Retzler, A.J., Tapanila, L., Steenberg, J.R., Johnson, C.J., and Myers, R.A., 2015, Post-impact depositional environments as a proxy for crater morphology, Late Devonian Alamo impact, Nevada: *Geosphere*, v. 11, p. 123–143, doi:10.1130/GES00964.1

**Section: MIN2**

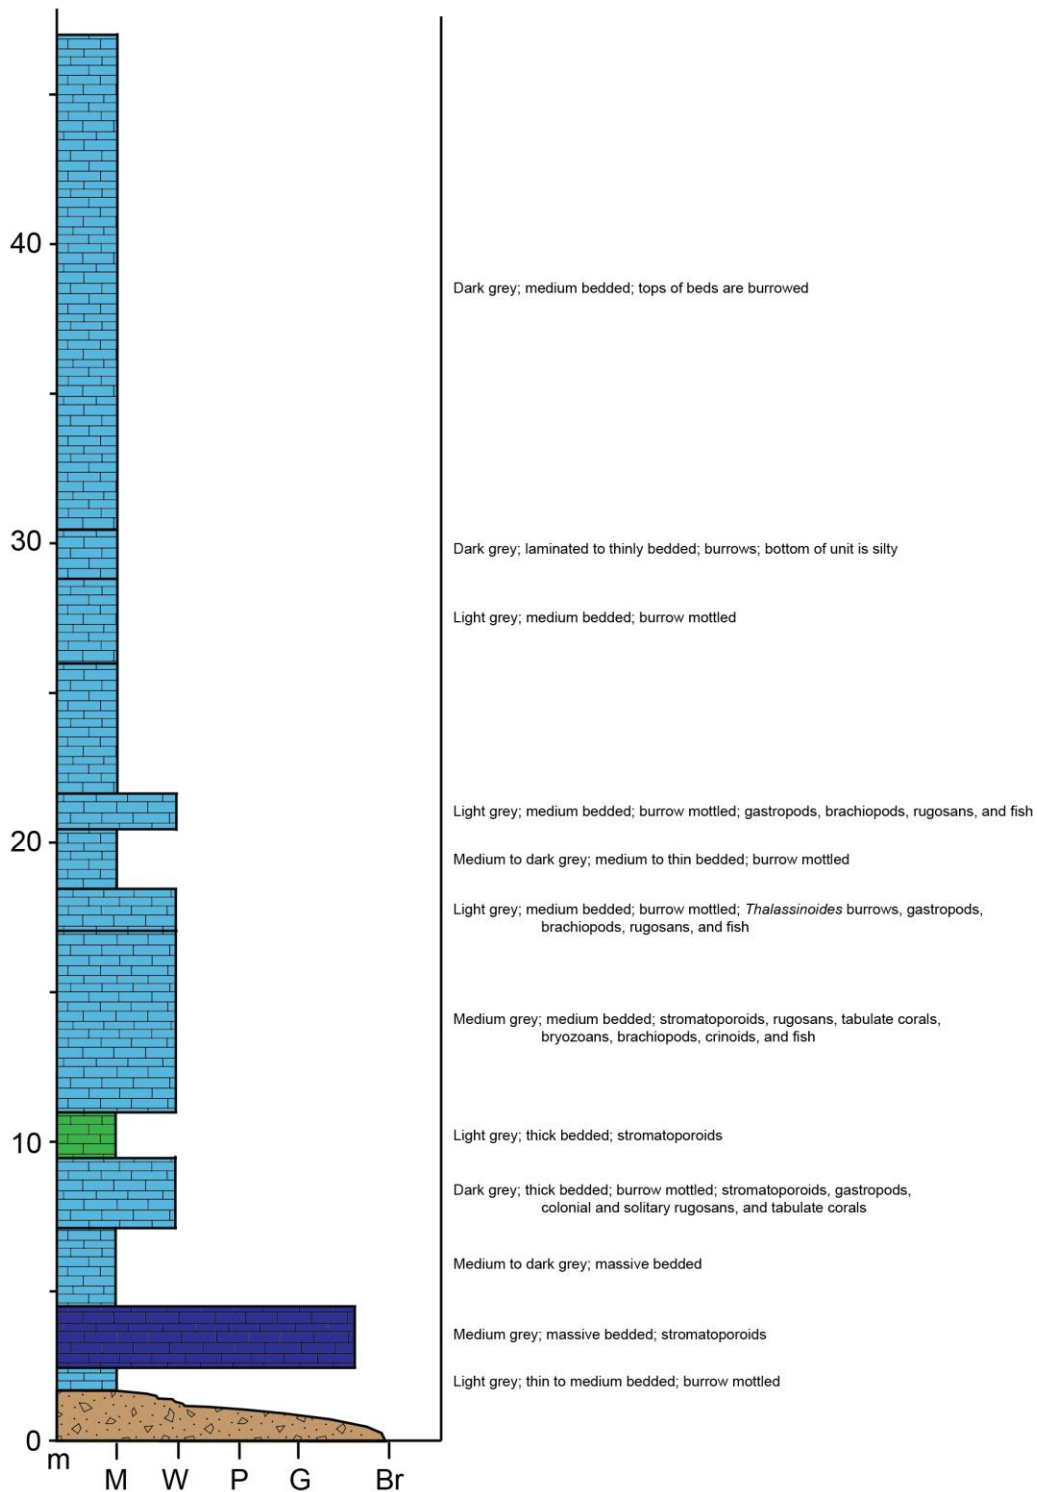

**Figure A15.** MIN2 detailed measured section.

Retzler, A.J., Tapanila, L., Steenberg, J.R., Johnson, C.J., and Myers, R.A., 2015, Post-impact depositional environments as a proxy for crater morphology, Late Devonian Alamo impact, Nevada: *Geosphere*, v. 11, p. 123–143, doi:10.1130/GES00964.1

Section: MI1

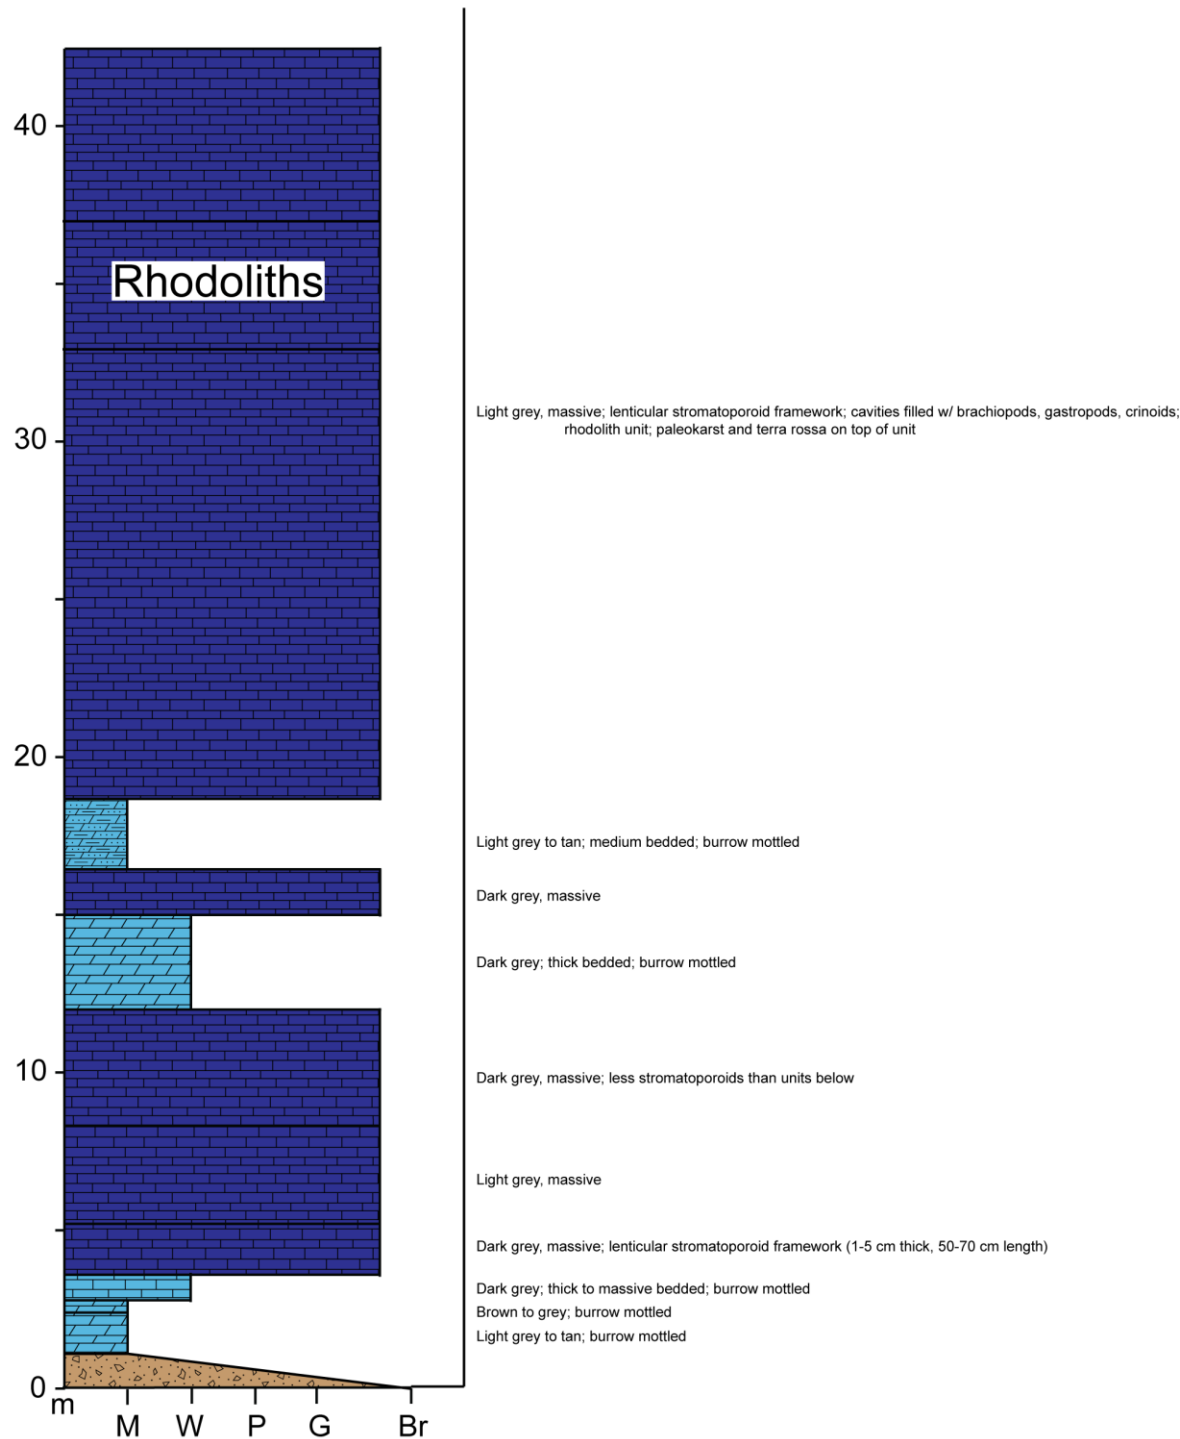

Figure A16. MI1 detailed measured section.

Retzler, A.J., Tapanila, L., Steenberg, J.R., Johnson, C.J., and Myers, R.A., 2015, Post-impact depositional environments as a proxy for crater morphology, Late Devonian Alamo impact, Nevada: *Geosphere*, v. 11, p. 123–143, doi:10.1130/GES00964.1

Section: MI1 cont.

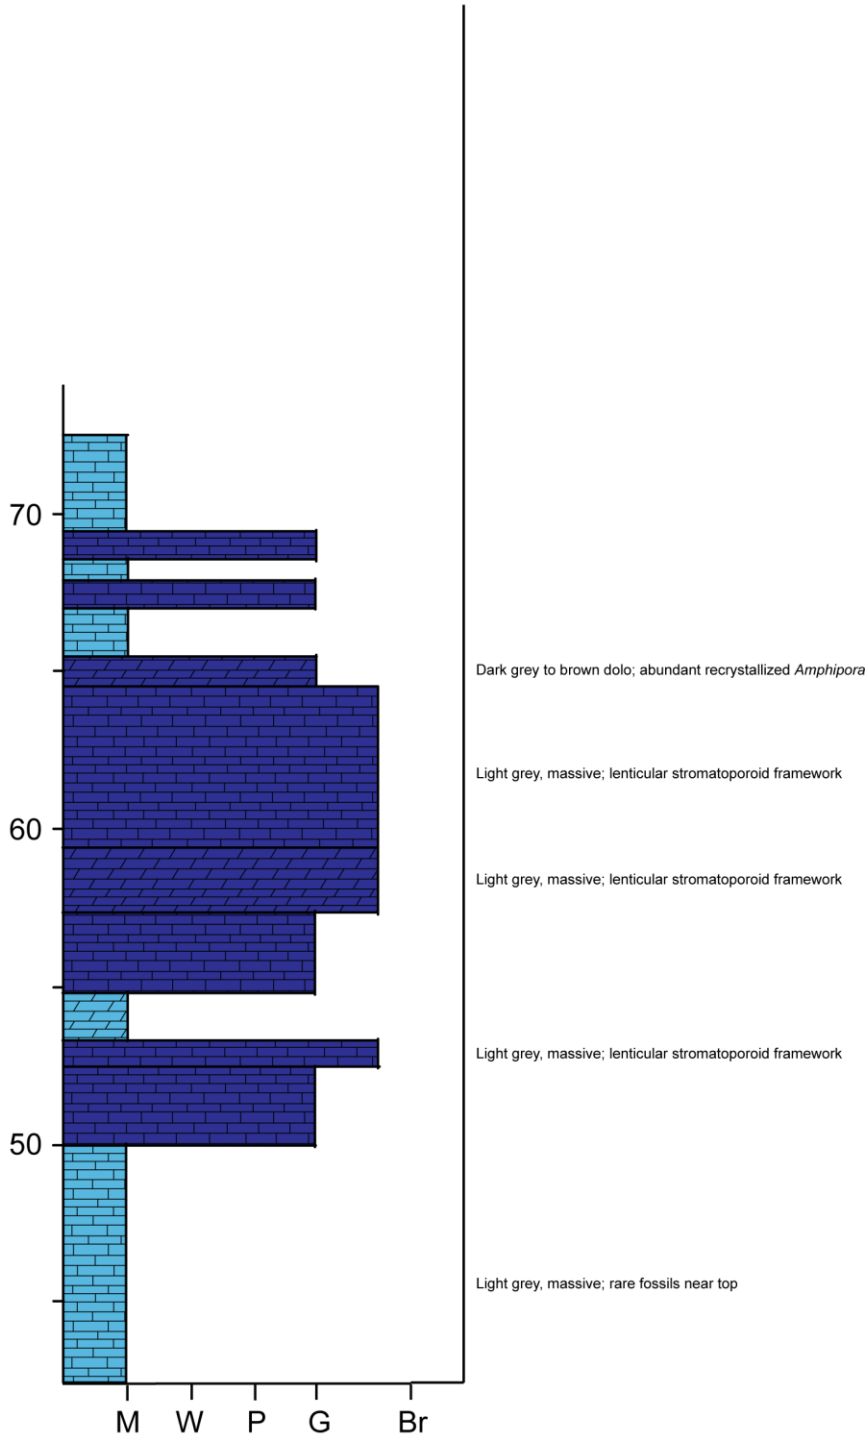

Retzler, A.J., Tapanila, L., Steenberg, J.R., Johnson, C.J., and Myers, R.A., 2015, Post-impact depositional environments as a proxy for crater morphology, Late Devonian Alamo impact, Nevada: *Geosphere*, v. 11, p. 123–143, doi:10.1130/GES00964.1

**Figure A17.** MI1 (cont.) detailed measured section.

**TABLE A1. COMPILED LOCALITIES AND GPS COORDINATES**

| LOCALITY ID | LATITUDE (N) | LONGITUDE (W) |
|-------------|--------------|---------------|
| GG1         | 37.827       | -115.440      |
| SW1         | 37.797       | -115.143      |
| CVS0        | 37.731       | -115.283      |
| CVS1        | 37.731       | -115.287      |
| CVS2        | 37.728       | -115.292      |
| FPW3        | 37.712       | -115.225      |
| FPW2        | 37.710       | -115.221      |
| BSV1        | 37.709       | -115.256      |
| FPW1        | 37.709       | -115.218      |
| MSN2        | 37.708       | -115.174      |
| MSN1        | 37.707       | -115.173      |
| BSV2        | 37.705       | -115.250      |
| SMFN3.5     | 37.700       | -115.143      |
| SMFN1       | 37.699       | -115.131      |
| SMFN2       | 37.698       | -115.133      |
| SMFN3       | 37.698       | -115.136      |
| SMFN4       | 37.697       | -115.145      |
| SMF2        | 37.697       | -115.134      |
| CVS0.5      | 37.693       | -115.273      |
| MS1         | 37.691       | -115.277      |
| HHN1        | 37.682       | -115.175      |
| SMF1        | 37.680       | -115.124      |
| SS3         | 37.679       | -115.339      |
| SS2         | 37.678       | -115.336      |
| USP2        | 37.651       | -115.347      |
| USP1        | 37.650       | -115.350      |
| DP1         | 37.648       | -115.307      |
| DP2         | 37.648       | -115.310      |
| HCW 2       | 37.646       | -115.179      |
| HCE1        | 37.645       | -115.169      |
| HCW 1       | 37.645       | -115.178      |
| HCC 1       | 37.645       | -115.174      |
| HCC 2       | 37.645       | -115.174      |

Retzler, A.J., Tapanila, L., Steenberg, J.R., Johnson, C.J., and Myers, R.A., 2015, Post-impact depositional environments as a proxy for crater morphology, Late Devonian Alamo impact, Nevada: *Geosphere*, v. 11, p. 123–143, doi:10.1130/GES00964.1

| LOCALITY ID | LATITUDE (N) | LONGITUDE (W) |
|-------------|--------------|---------------|
| HCC 3       | 37.644       | -115.176      |
| HCC2        | 37.643       | -115.174      |
| HCS1        | 37.642       | -115.167      |
| MIN2        | 37.638       | -115.340      |
| MIN1        | 37.632       | -115.345      |
| MI2         | 37.624       | -115.351      |
| MI1         | 37.624       | -115.350      |
| SR1         | 37.624       | -115.352      |
| HICKS       | 37.623       | -115.355      |
| HHK1        | 37.598       | -115.211      |
| MIS0        | 37.587       | -115.331      |
| MIS1        | 37.583       | -115.333      |
| MIS2        | 37.579       | -115.329      |
| HCE2        | 37.567       | -115.209      |
| HSN2        | 37.566       | -115.205      |
| HHS4        | 37.556       | -115.206      |
| HHS5        | 37.555       | -115.205      |
| HHS2        | 37.555       | -115.204      |
| HHS3        | 37.555       | -115.204      |
| HHS3.7      | 37.554       | -115.207      |
| HHS-DM1     | 37.553       | -115.205      |
| HHS-DM2     | 37.553       | -115.204      |
| HHS-DM3     | 37.552       | -115.207      |
| HHS1 COMP   | 37.551       | -115.205      |
| HHS1        | 37.550       | -115.202      |
| DDB         | 37.417       | -115.373      |
| DEL1        | 37.079       | -114.971      |
| HN5         | 37.447       | -115.430      |
| HN4         | 37.445       | -115.425      |
| HN3         | 37.441       | -115.424      |
| HN2         | 37.439       | -115.423      |
| HN1.5       | 37.440       | -115.418      |
| HN1         | 37.437       | -115.419      |
| HN0.5       | 37.434       | -115.418      |
| DDB2        | 37.410       | -115.396      |
| DDB1        | 37.408       | -115.397      |
| HS1         | 37.402       | -115.396      |

Retzler, A.J., Tapanila, L., Steenberg, J.R., Johnson, C.J., and Myers, R.A., 2015, Post-impact depositional environments as a proxy for crater morphology, Late Devonian Alamo impact, Nevada: *Geosphere*, v. 11, p. 123–143, doi:10.1130/GES00964.1

| LOCALITY ID | LATITUDE (N) | LONGITUDE (W) |
|-------------|--------------|---------------|
| HS2         | 37.397       | -115.397      |
| HS3         | 37.396       | -115.396      |
| HE1         | 37.406       | -115.380      |
| HE1.5       | 37.404       | -115.380      |
| HE2         | 37.402       | -115.379      |
| HE2.5       | 37.383       | -115.372      |
| HE3         | 37.381       | -115.372      |
| HE4         | 37.371       | -115.365      |
| HE4.5       | 37.374       | -115.374      |
| HE4.7       | 37.370       | -115.368      |
| HE5         | 37.367       | -115.373      |
| HE6         | 37.365       | -115.365      |
| TK1         | 37.351       | -115.359      |
| PTN1        | 37.498       | -115.442      |
| PTN2        | 37.499       | -115.441      |
| PTN0.5      | 37.496       | -115.444      |
| MMS1        | 37.622       | -115.487      |
| MMS2        | 37.625       | -115.482      |
| MMN1        | 37.685       | -115.498      |
| MMN2        | 37.685       | -115.497      |
| MMN3        | 37.686       | -115.497      |
| MMN4        | 37.686       | -115.497      |
| MMN5        | 37.693       | -115.496      |
| GGs1        | 37.828       | -115.439      |
| GGs2        | 37.832       | -115.437      |
| GGs3        | 37.853       | -115.434      |
| PTN0        | 37.506       | -115.435      |
